# Supplementary material for: Stiff matrix induces exosome secretion to promote tumour growth
Source: Springer Nature journal article supplement (doi:10.1038/s41556-023-01092-1), 2023-02-16

Figure 4a

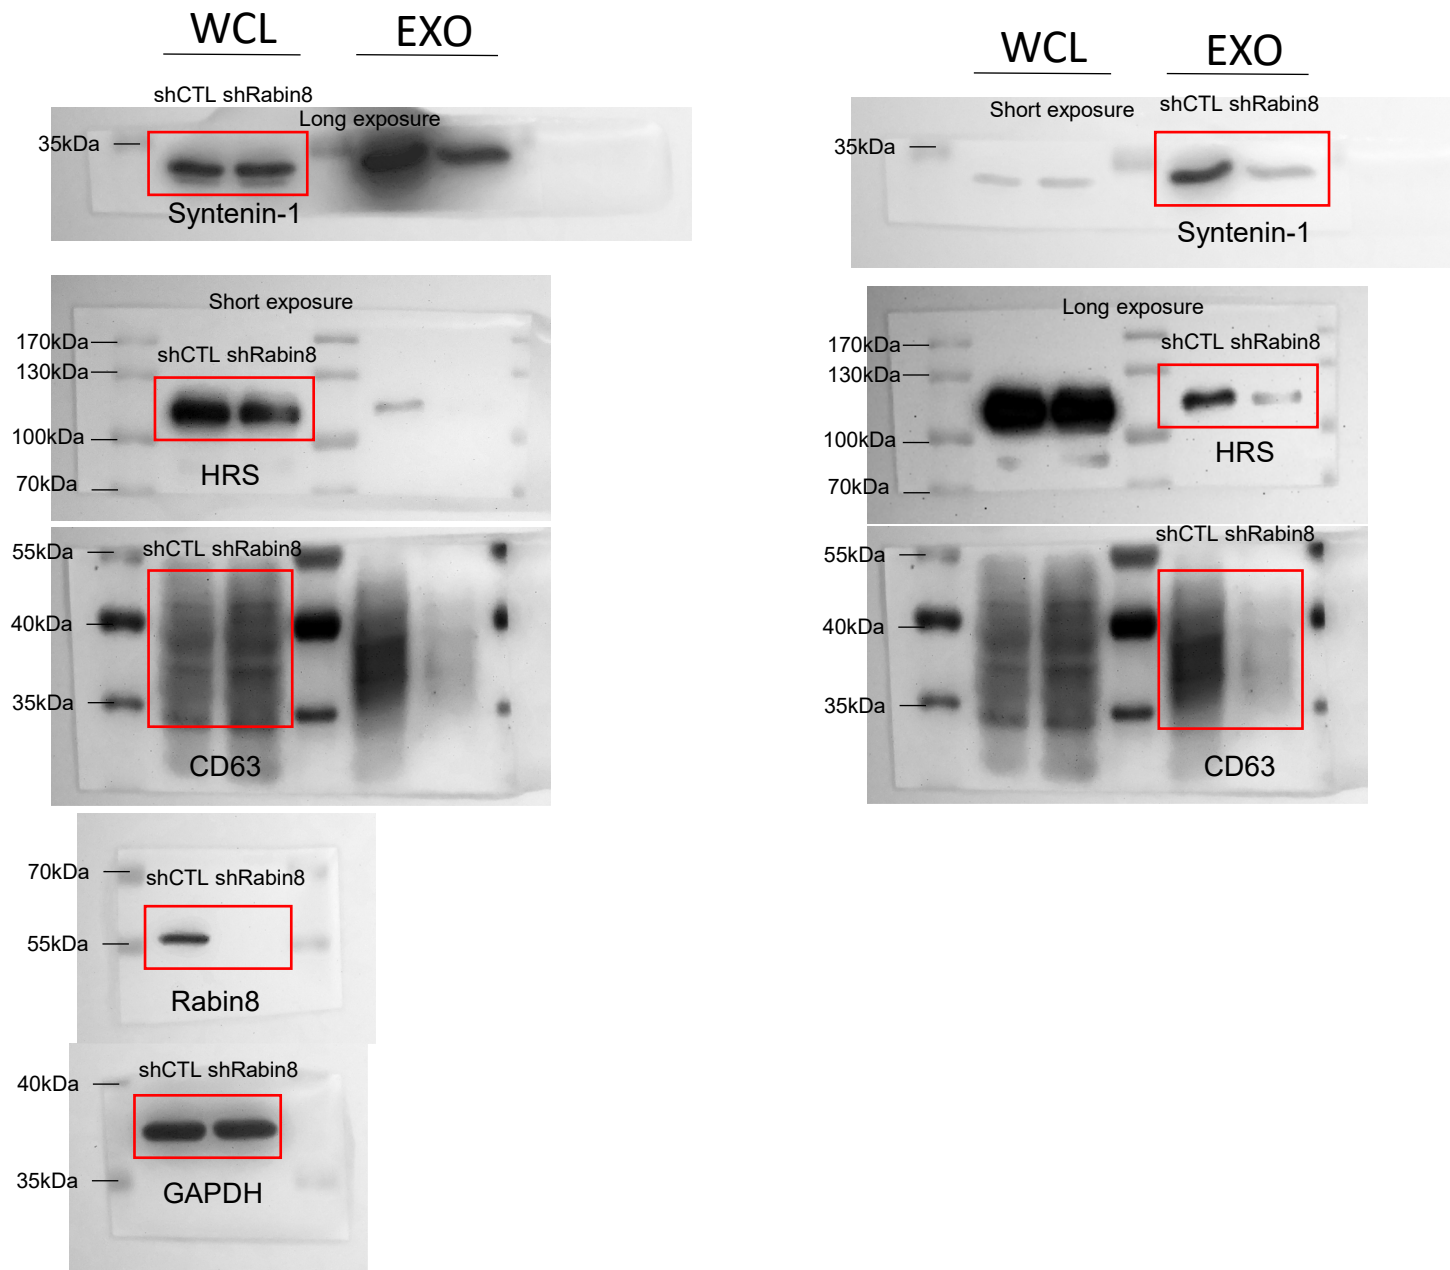

Figure 4d

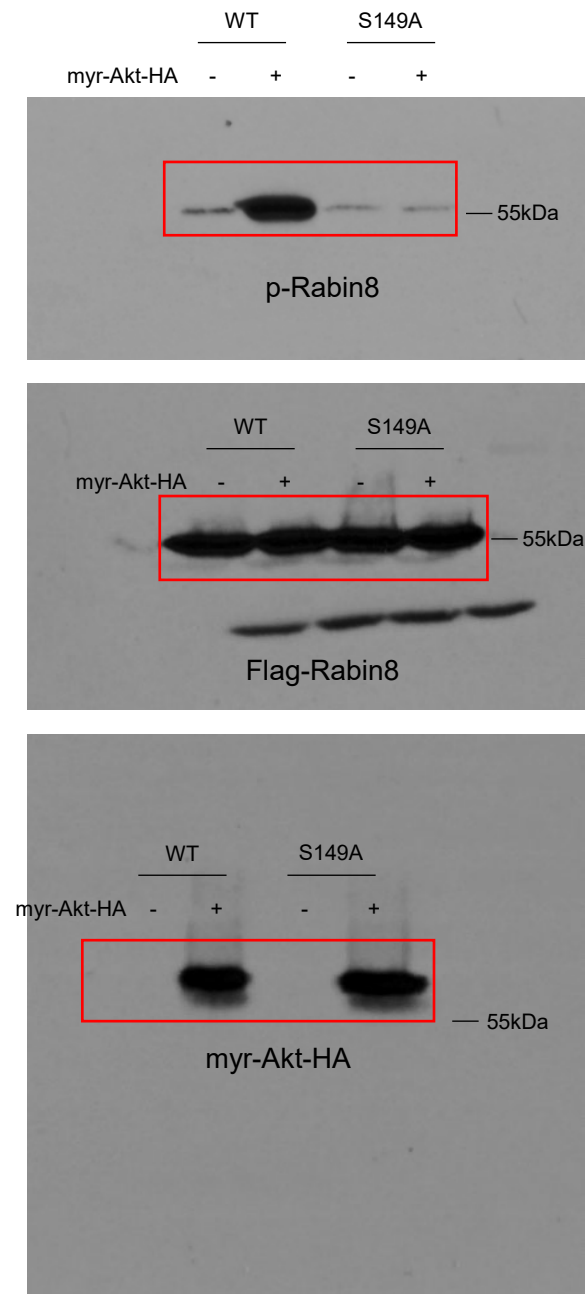

Figure 4e

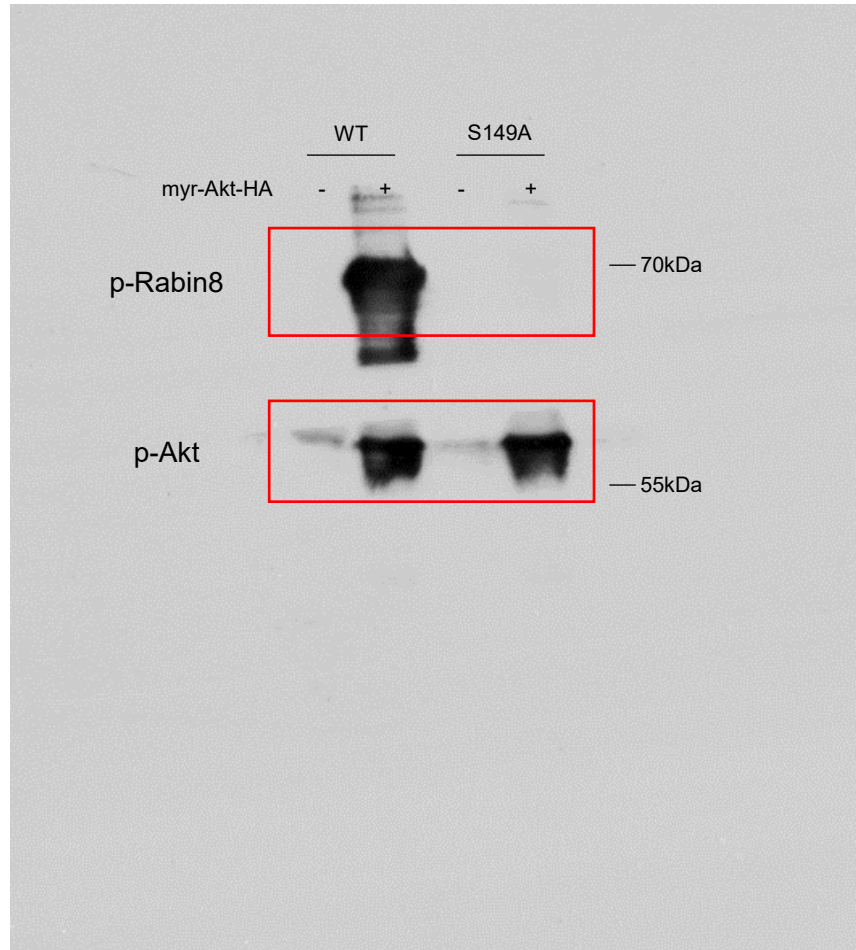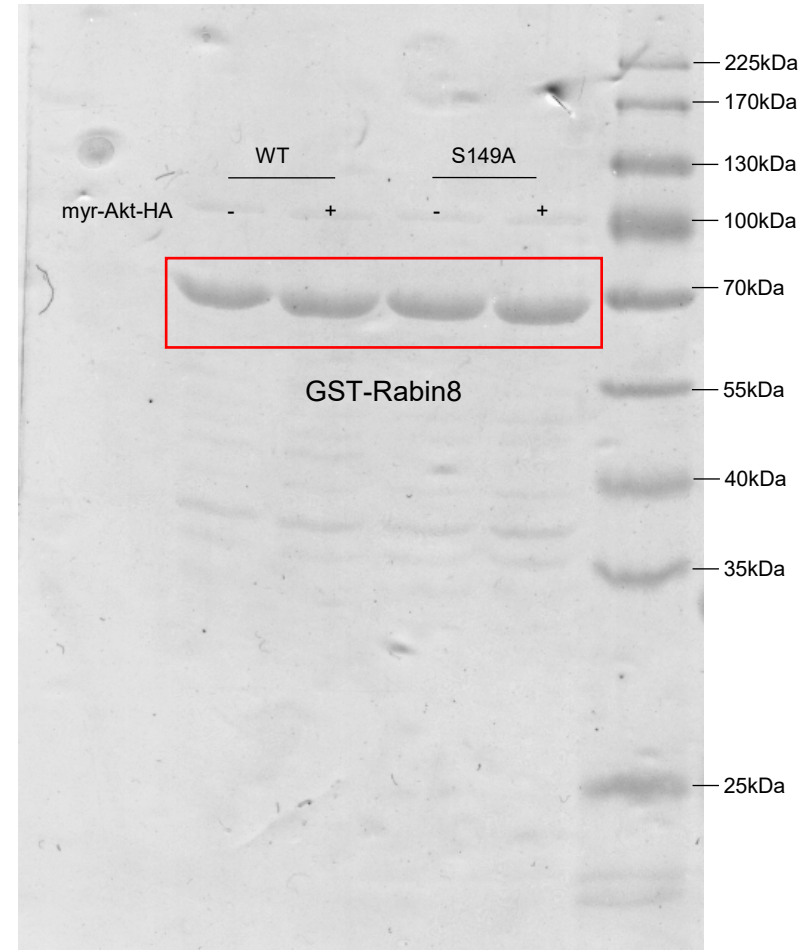

Figure 4f

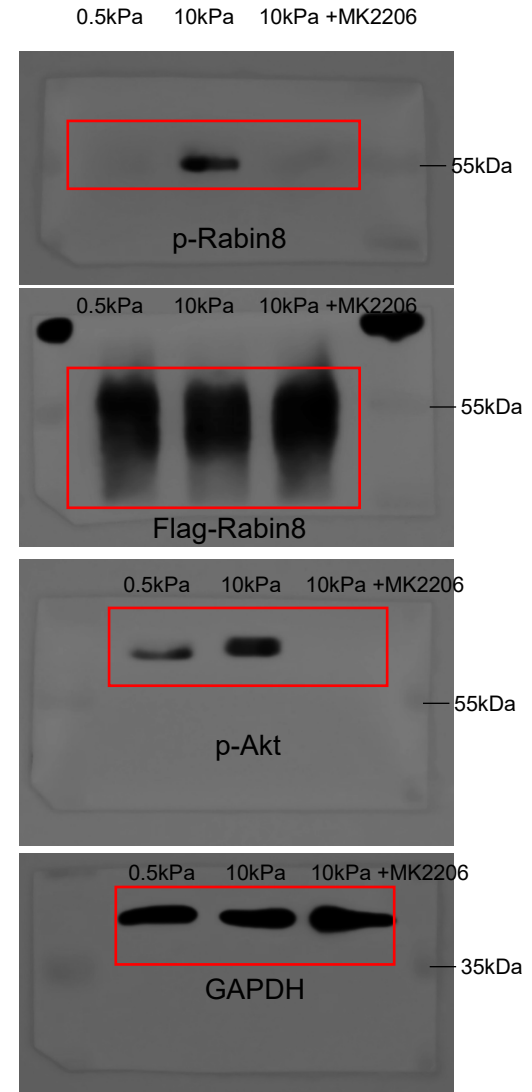



Figure 4i

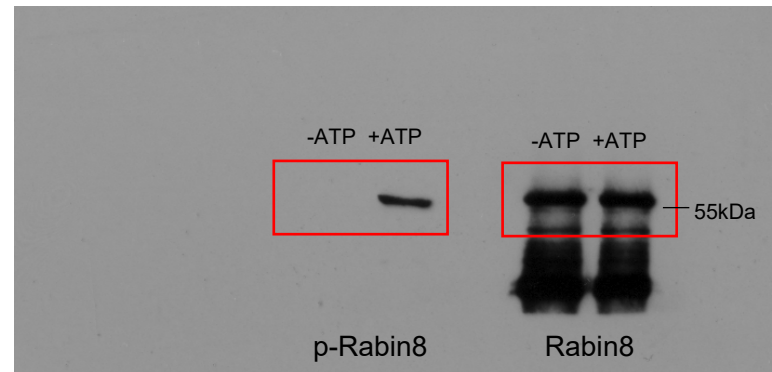

Supplement: 41556_2023_1092_MOESM6_ESM.pdf [file 41556_2023_1092_MOESM6_ESM.pdf]
