# Supplementary material for: Stiff matrix induces exosome secretion to promote tumour growth
Source: Springer Nature journal article supplement (doi:10.1038/s41556-023-01092-1), 2023-02-16

Figure 7a

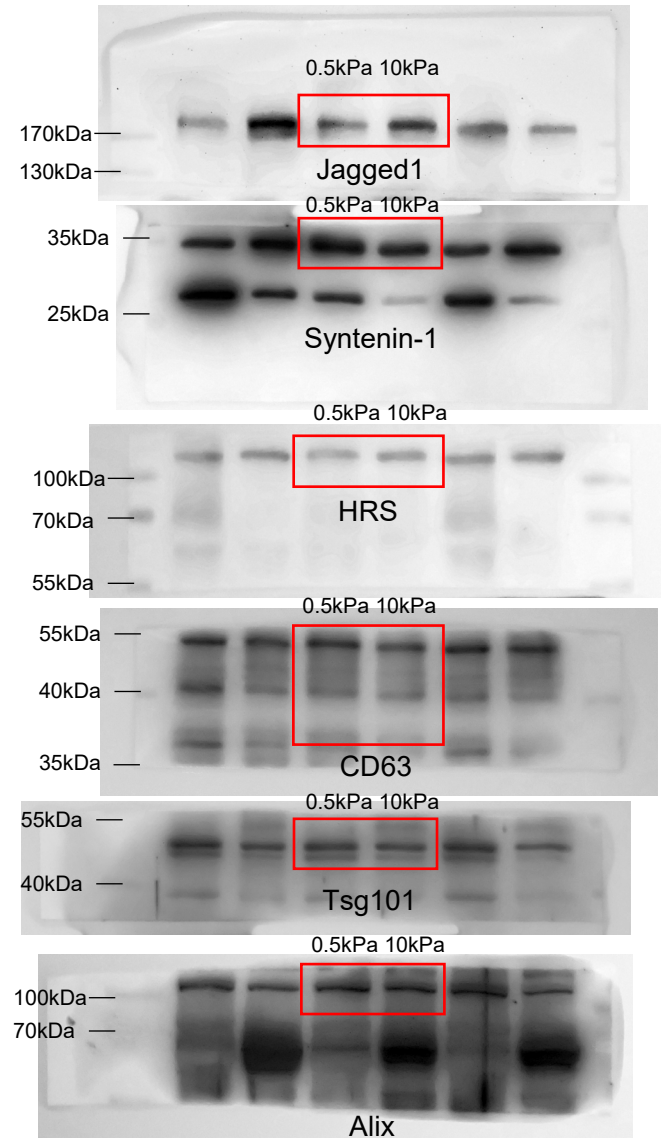

Figure 7b

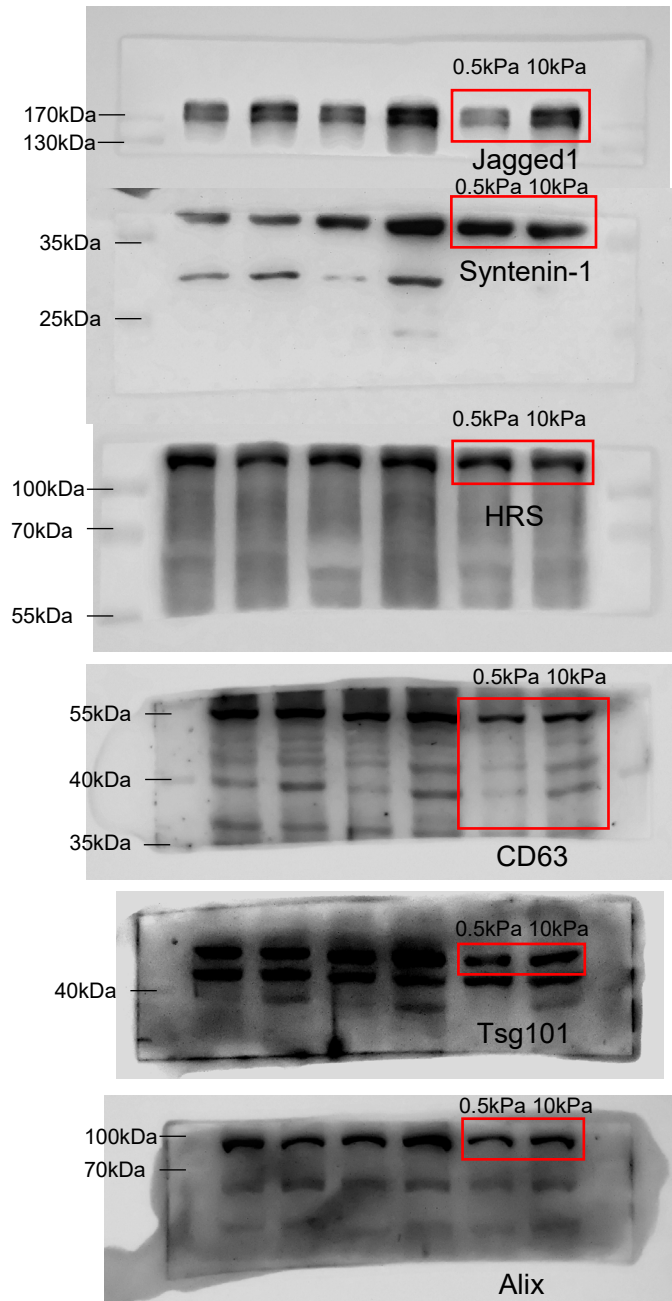

Figure 7e

IP:Flag (lane1-2)

IP: IgG (lane3)

IP: Myc (lane4)

### HA-Input

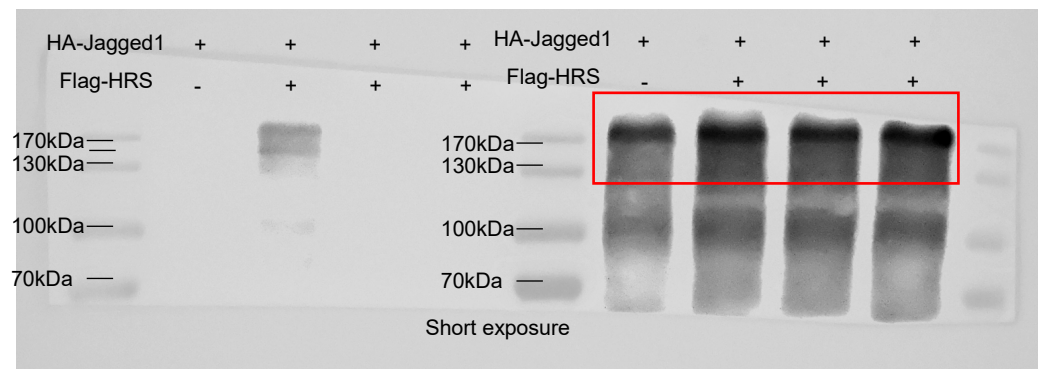

### HA-IP

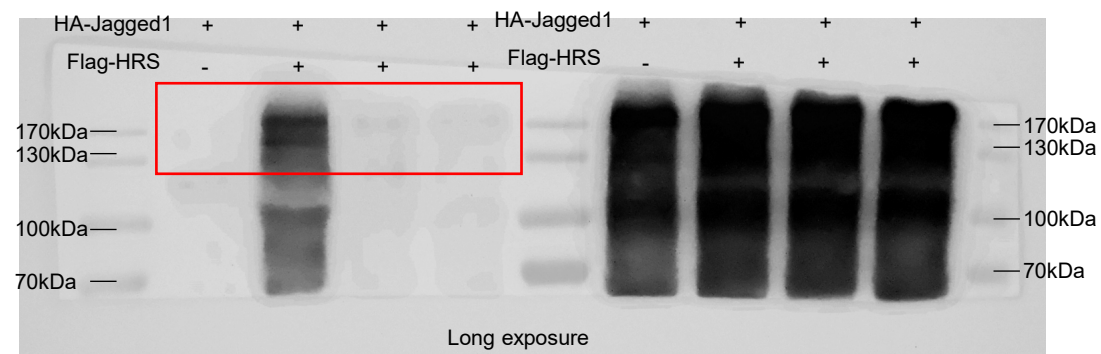

### Flag-Input

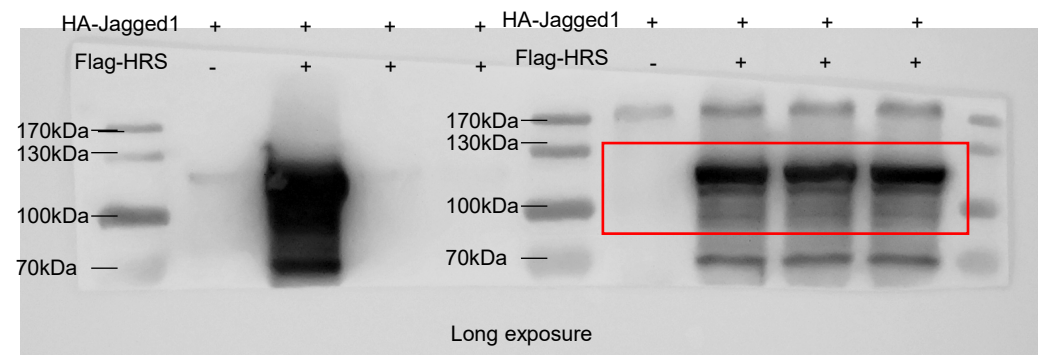

### Flag-IP

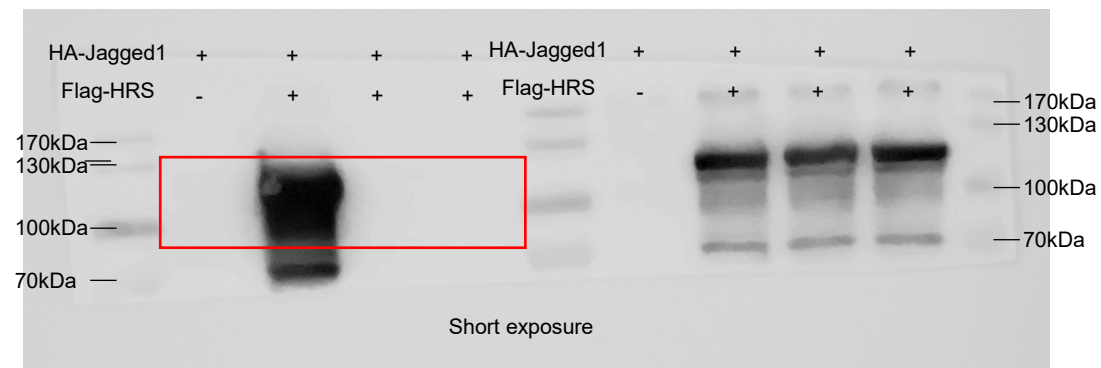

Supplement: 41556_2023_1092_MOESM8_ESM.pdf [file 41556_2023_1092_MOESM8_ESM.pdf]
