# Supplementary material for: Stiff matrix induces exosome secretion to promote tumour growth
Source: Springer Nature journal article supplement (doi:10.1038/s41556-023-01092-1), 2023-02-16

Extended Data Fig. 3a

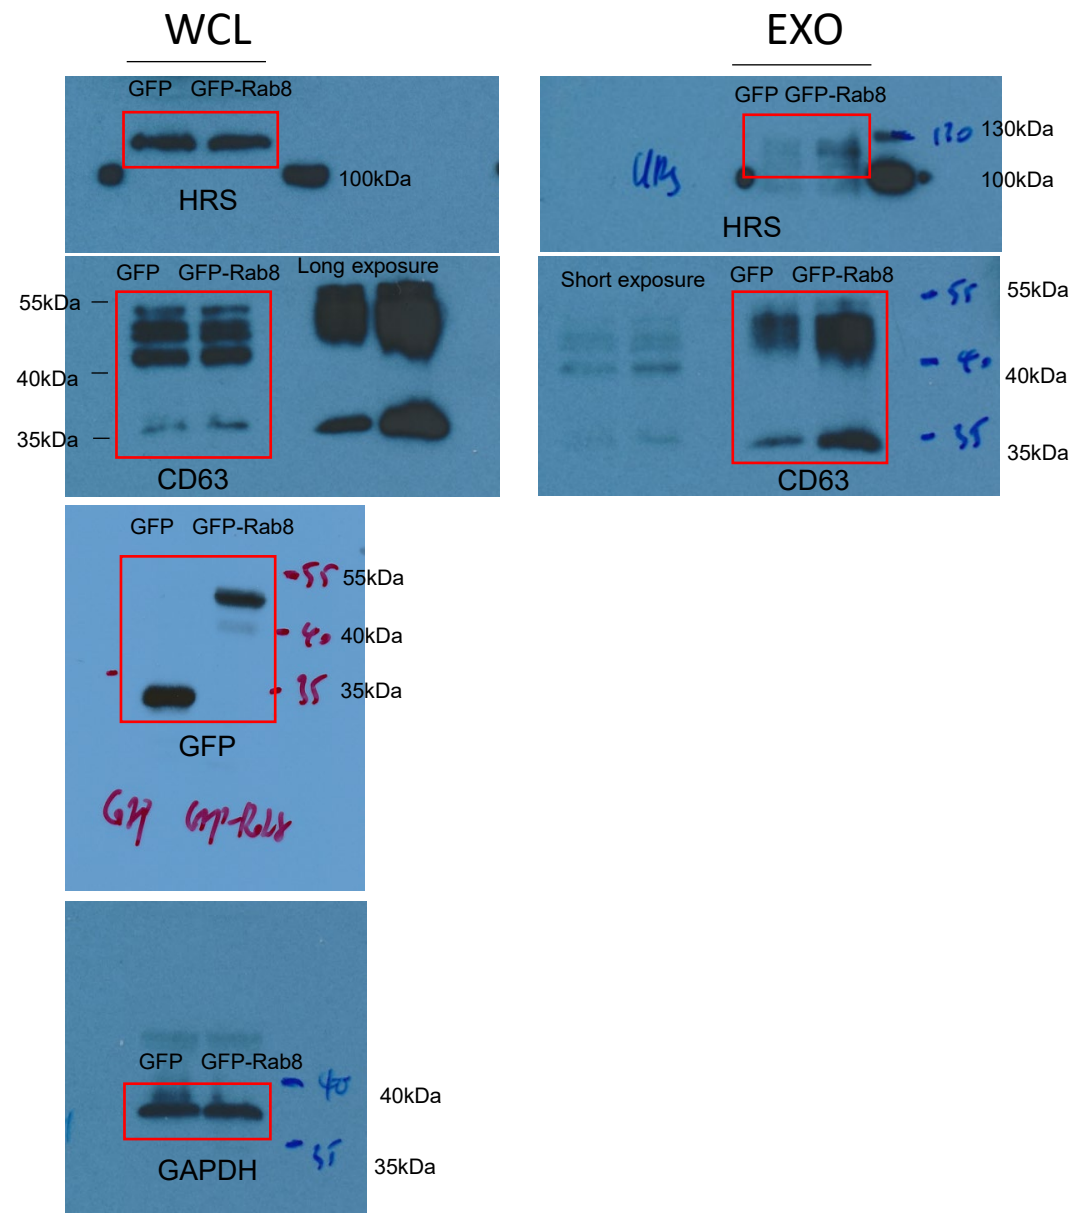

Supplement: 41556_2023_1092_MOESM10_ESM.pdf [file 41556_2023_1092_MOESM10_ESM.pdf]
